# Supplementary material for: Xinghamide A, a New Cyclic Nonapeptide Found in Streptomyces xinghaiensis
Source: MDPI journal article supplement (doi:10.3390/md21100509), 2023-09-26
Supplement: s1 [file s1]

## *Supporting Information for*

*Article*

# **Xinghamide A, a New Cyclic Nonapeptide Found in *Streptomyces xinghaiensis***

Soohyun Um <sup>1,†</sup>, Jaeyoun Lee <sup>1,†</sup> , Sung Jin Kim <sup>2</sup>, Kyung A Cho <sup>1</sup>, Ki Sung Kang <sup>2</sup> and Seung Hyun Kim <sup>1,\*</sup> 

<sup>1</sup> College of Pharmacy, Yonsei Institute of Pharmaceutical Sciences, Yonsei University, Incheon 21983, Republic of Korea; soohyunum@yonsei.ac.kr (S.U.); jaeyoun1024@yonsei.ac.kr (J.L.); kacjjang@gmail.com (K.A.C.)

<sup>2</sup> College of Korean Medicine, Gachon University, Seongnam 13120, Republic of Korea; sungjinkim001@gmail.com (S.J.K.); kkang@gachon.ac.kr (K.S.K.)

\* Correspondence: kimsh11@yonsei.ac.kr

† These authors contributed equally to this work.

## Table of Contents

- Figure S1.** The bacterial strain *S. xinghaiensis* YSL1 cultivated on YPM agar plate after 14 days.
- Figure S2.** GNPS molecular networking of an ethyl acetate crude extract of liquid culture, an ethyl acetate crude extract of solid culture, and a methanol crude extract of solid culture after 14 days of cultivation of *S. xinghaiensis* YSL1.
- Figure S3.**  $^1\text{H}$  NMR spectrum (850 MHz) of xinghamide A (**1**) in  $\text{DMSO-}d_6$ .
- Figure S4.**  $^{13}\text{C}$  NMR spectrum (212.5 MHz) of xinghamide A (**1**) in  $\text{DMSO-}d_6$ .
- Figure S5.** HSQC NMR spectrum of xinghamide A (**1**) in  $\text{DMSO-}d_6$ .
- Figure S6.** COSY NMR spectrum of xinghamide A (**1**) in  $\text{DMSO-}d_6$ .
- Figure S7.** HMBC NMR spectrum of xinghamide A (**1**) in  $\text{DMSO-}d_6$ .
- Figure S8.** Magnified HMBC NMR spectrum ( $\delta_{\text{C}}$ : 160-180 ppm;  $\delta_{\text{H}}$ : 7.5-8.3 ppm) of xinghamide A (**1**) in  $\text{DMSO-}d_6$ .
- Figure S9.** TOCSY NMR spectrum of xinghamide A (**1**) in  $\text{DMSO-}d_6$ .
- Figure S10.** ROESY NMR spectrum of xinghamide A (**1**) in  $\text{DMSO-}d_6$ .
- Figure S11.** TIC of *S. xinghaiensis* YSL1 culture extract and EIC of xinghamide A (**1**).
- Figure S12.** Advanced Marfey's analysis of xinghamide A (**1**).
- Figure S13.** GITC analysis of hydrolysate of **1** to confirm configuration of  $\beta$  carbon of threonine in **1**.
- Figure S14.** HRESIMS/MS analysis of xinghamide A (**1**).
- Table S1.** LC/MS analysis of L, D-FDLA derivatives of the amino acids in xinghamide A (**1**).

**Figure S1.** The bacterial strain *S. xinghaiensis* YSL1 cultivated on YPM agar plate after 14 days.

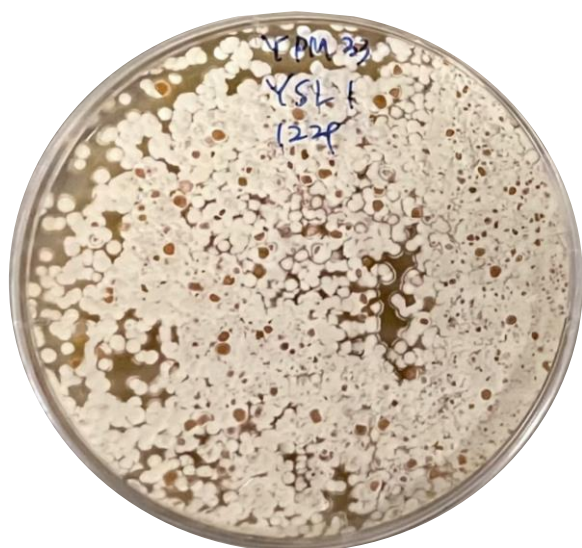

**Figure S2.** GNPS molecular networking of an ethyl acetate crude extract of liquid culture, an ethyl acetate crude extract of solid culture, and a methanol crude extract of solid culture after 14 days of cultivation of *S. xinghaiensis* YSL1.

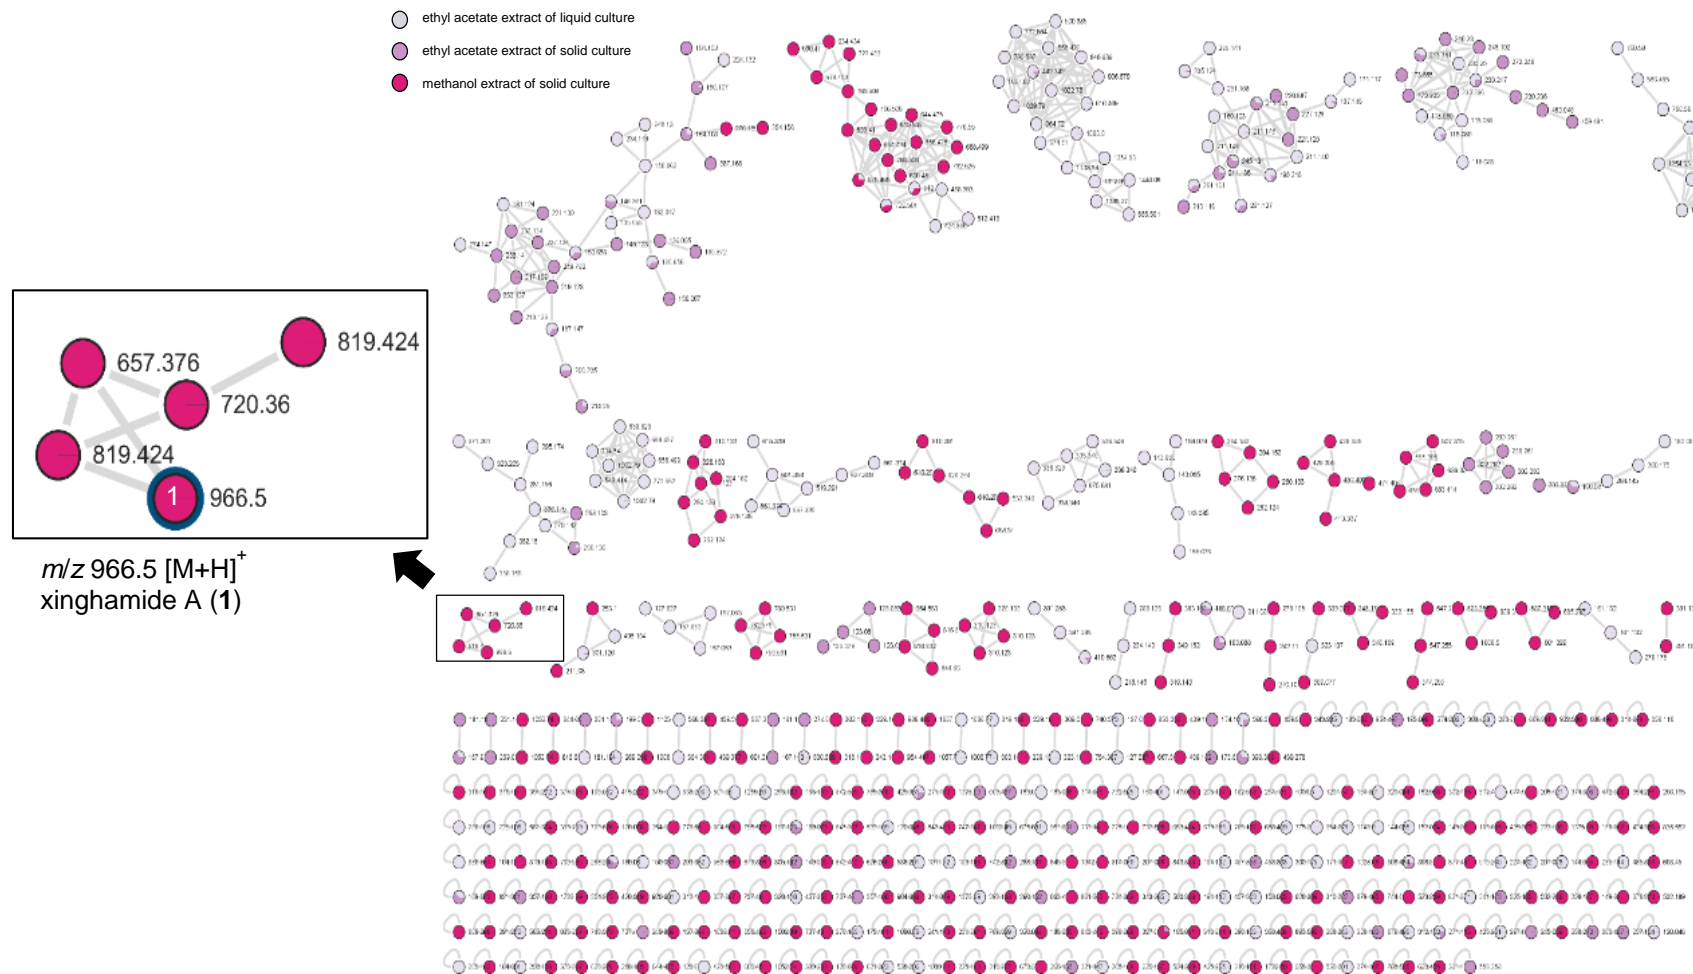

YSL1 966

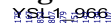

— — — — —

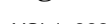

**Figure S5.** HSQC NMR spectrum of xinghamide A (**1**) in DMSO-*d*<sub>6</sub>.

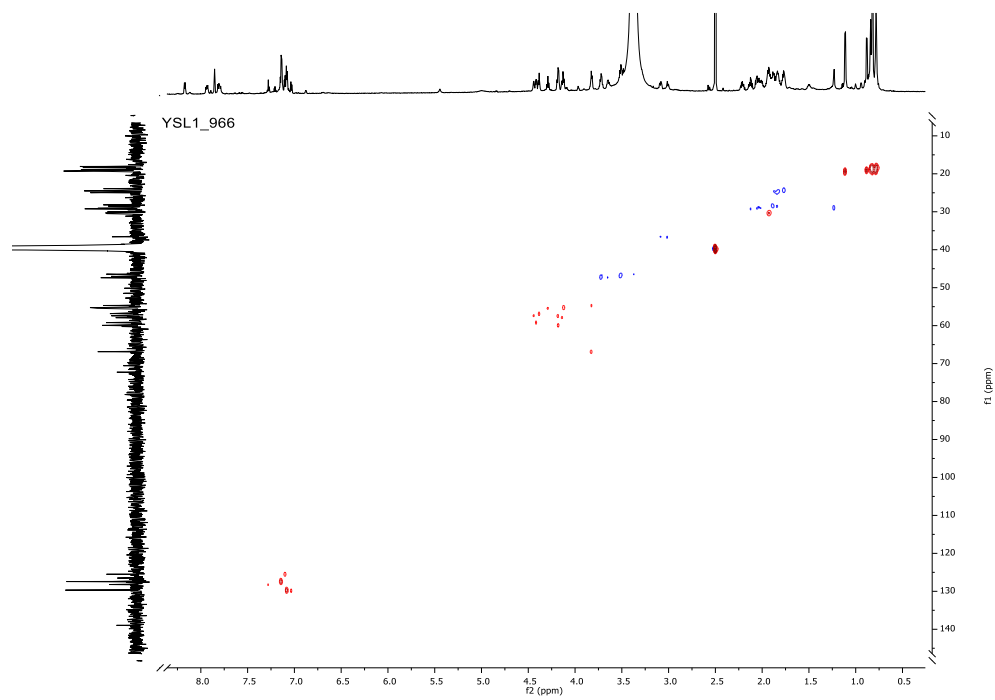

**Figure S6.** COSY NMR spectrum of xinghamide A (**1**) in DMSO-*d*<sub>6</sub>.

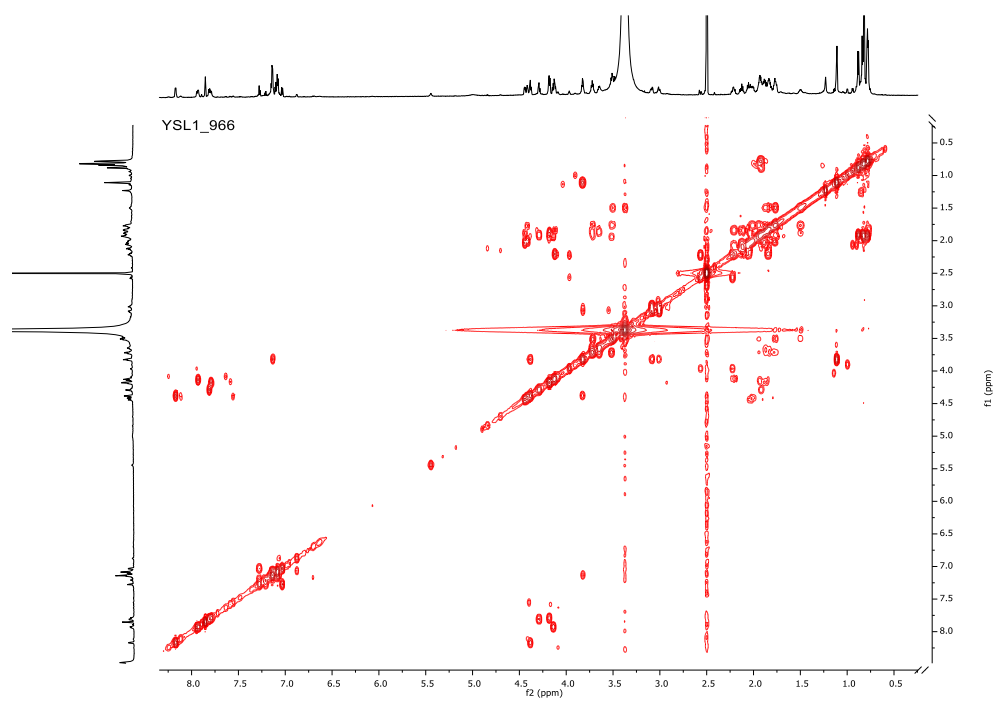

**Figure S7.** HMBC NMR spectrum of xinghamide A (**1**) in DMSO-*d*<sub>6</sub>.

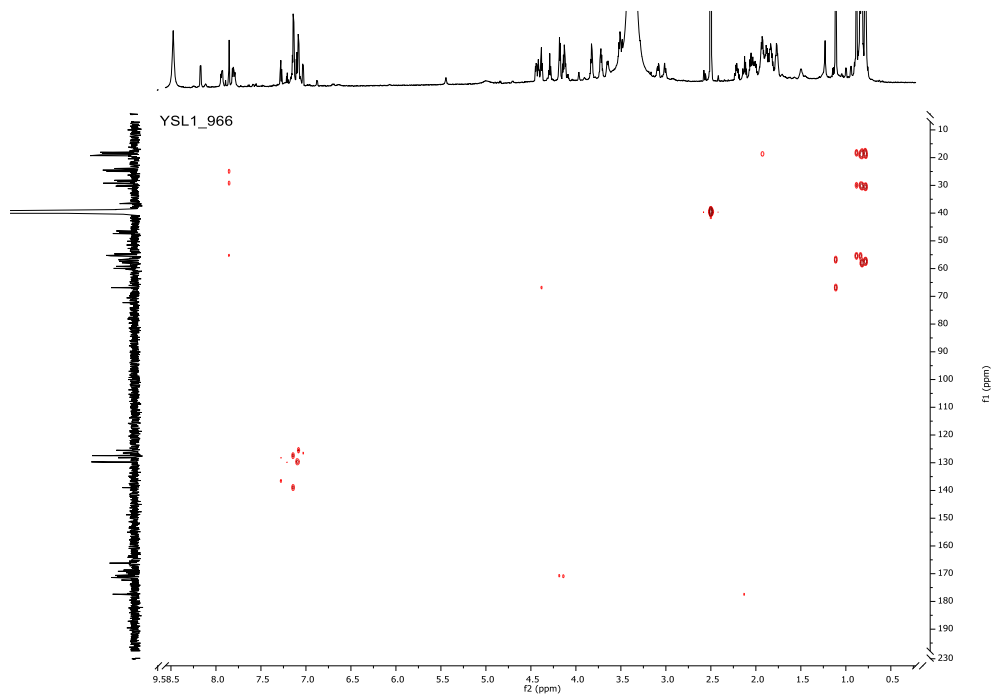

**Figure S8.** Magnified HMBC NMR spectrum (δ<sub>C</sub>: 160-180 ppm; δ<sub>H</sub>: 7.5-8.3 ppm) of xinghamide A (**1**) in DMSO-*d*<sub>6</sub>.

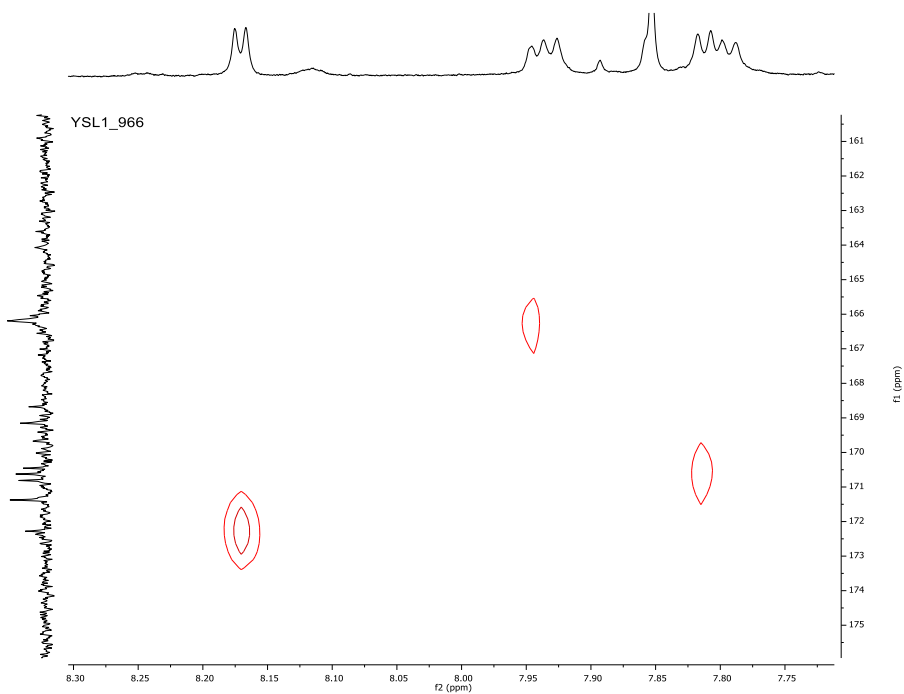

**Figure S9.** TOCSY NMR spectrum of xinghamide A (**1**) in DMSO- $d_6$ .

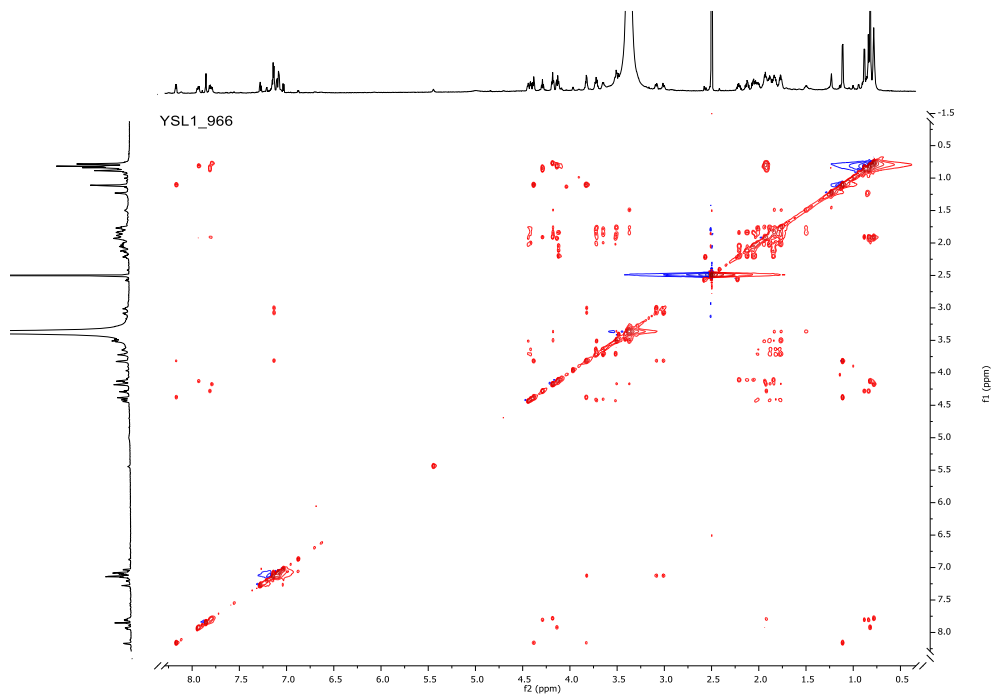

**Figure S10.** ROESY NMR spectrum of xinghamide A (**1**) in DMSO- $d_6$ .

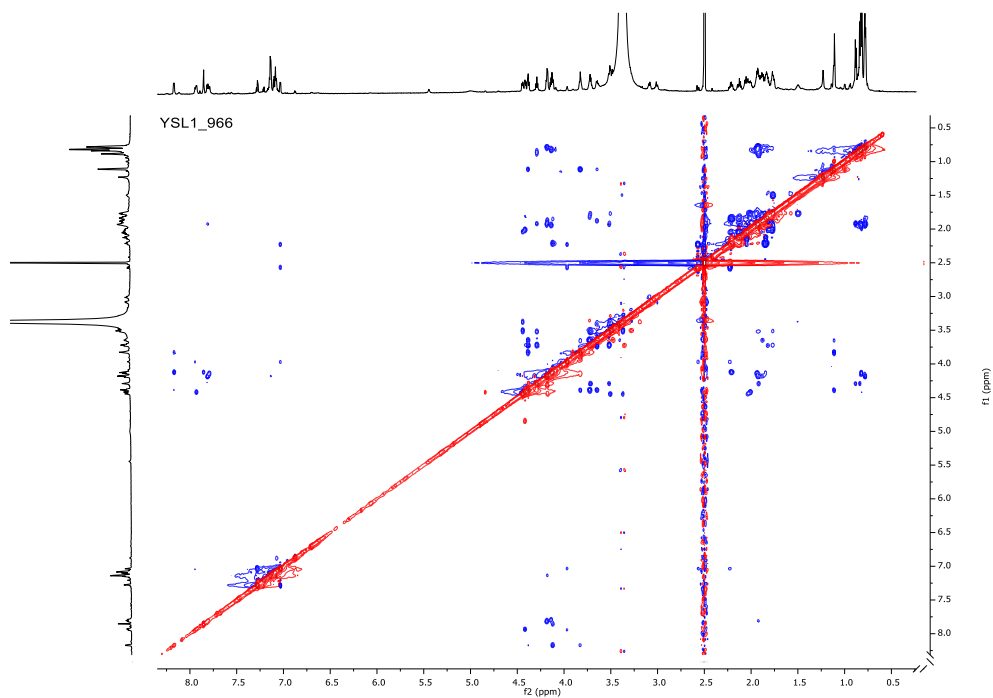



**Figure S11.** TIC of *S. xinghaiensis* YSL1 culture methanol crude extract and EIC of xinghamide A (1).

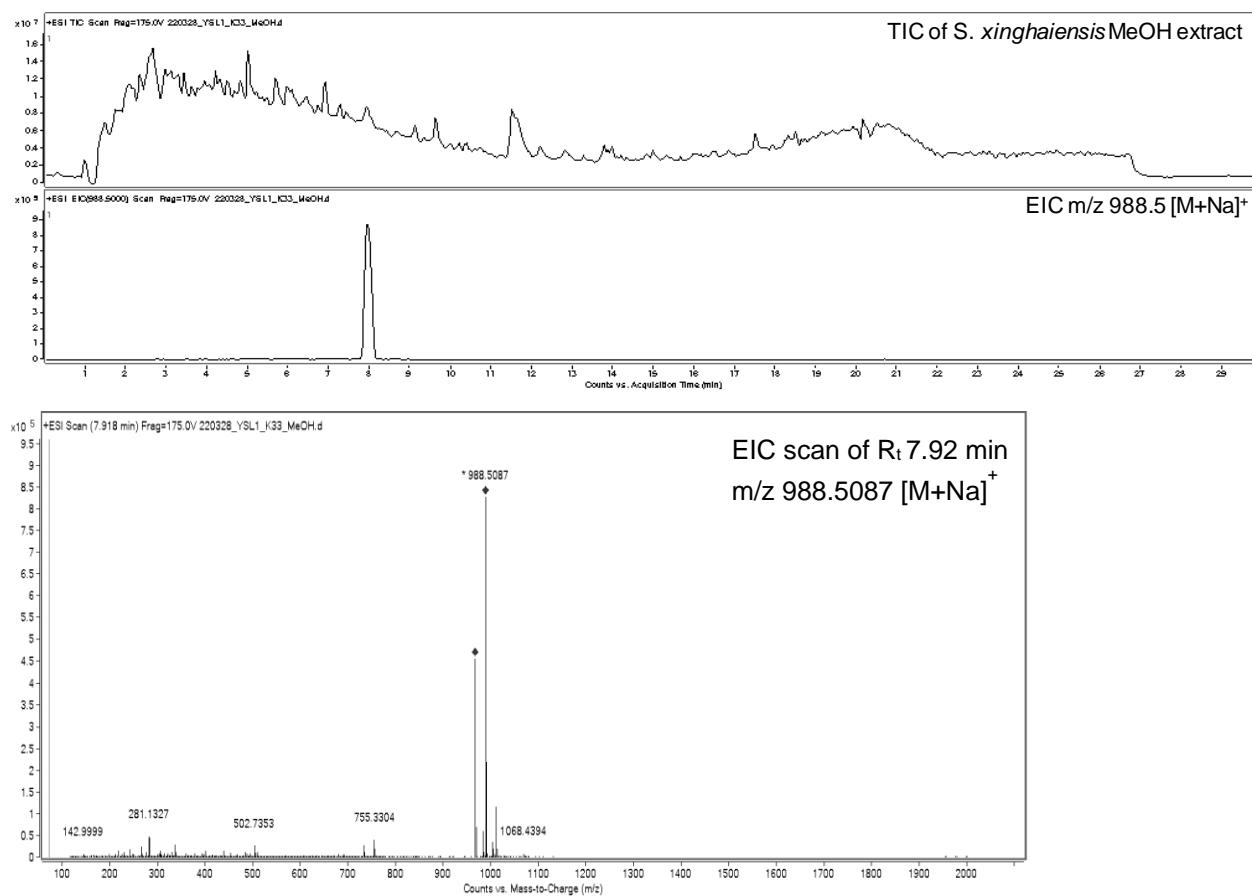

**Figure S12.** Advanced Marfey's analysis of xinghamide A (**1**).

**(A)** Comparison between L-FDLA and D-FDLA derivatives of threonine in **1**.

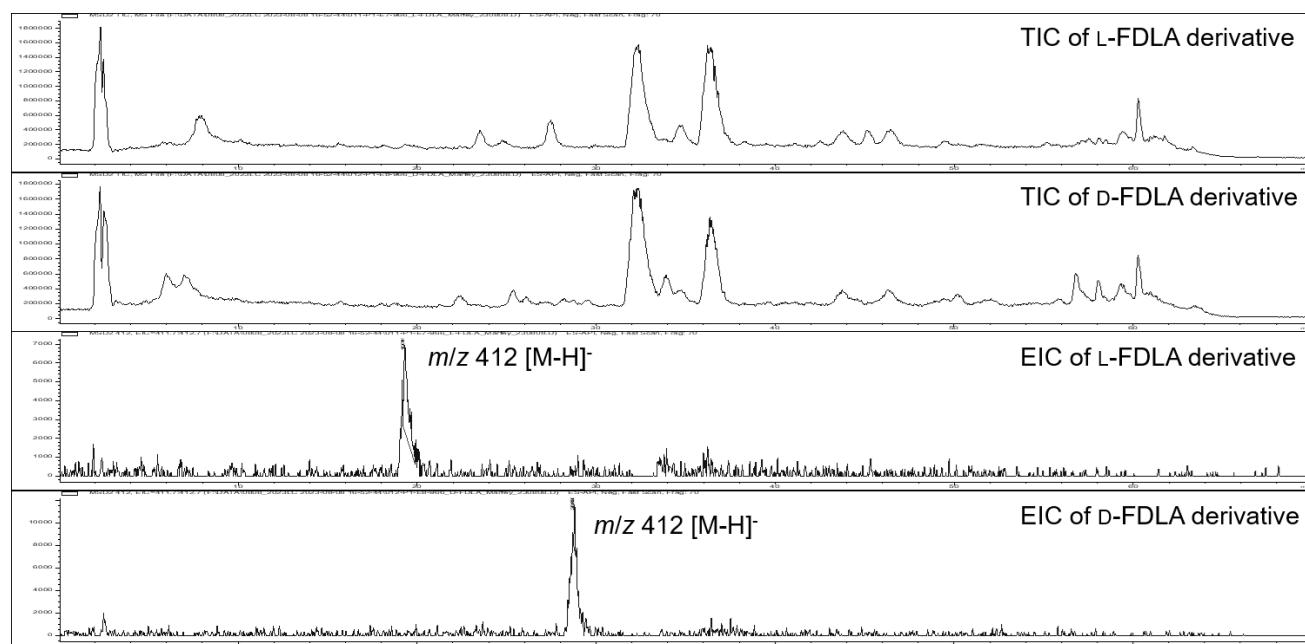

**(B)** Comparison between L-FDLA and D-FDLA derivatives of glutamic acid in **1**.

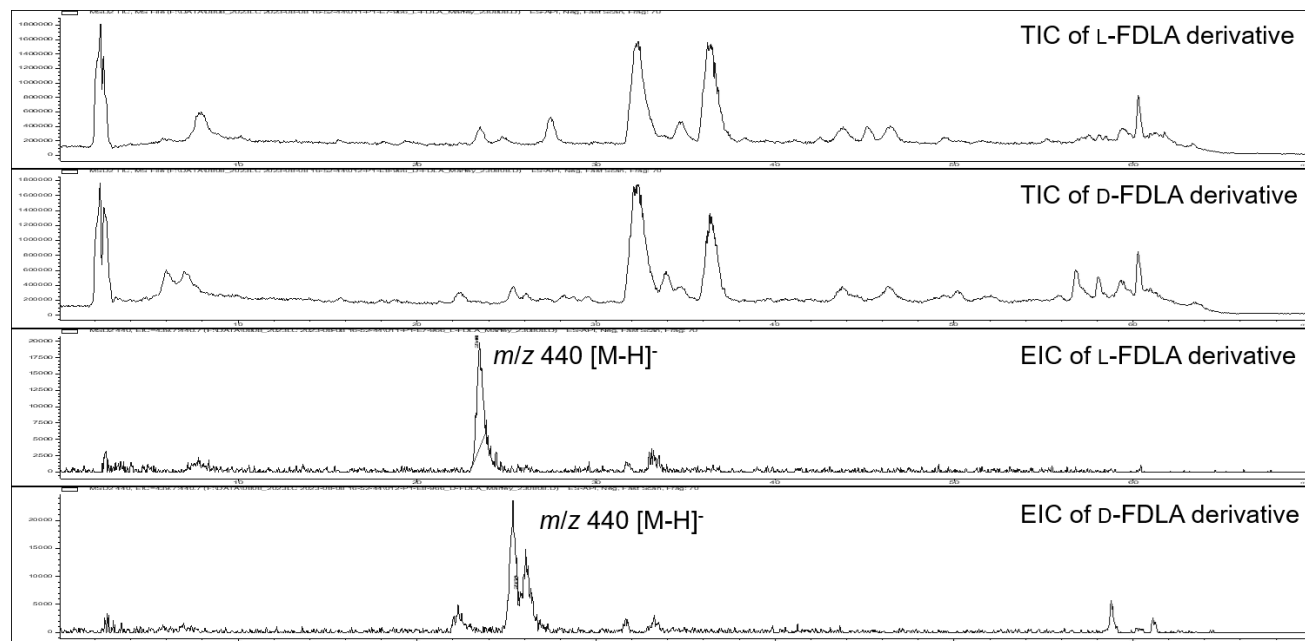

**(C)** Comparison between L-FDLA and D-FDLA derivatives of proline in **1**.

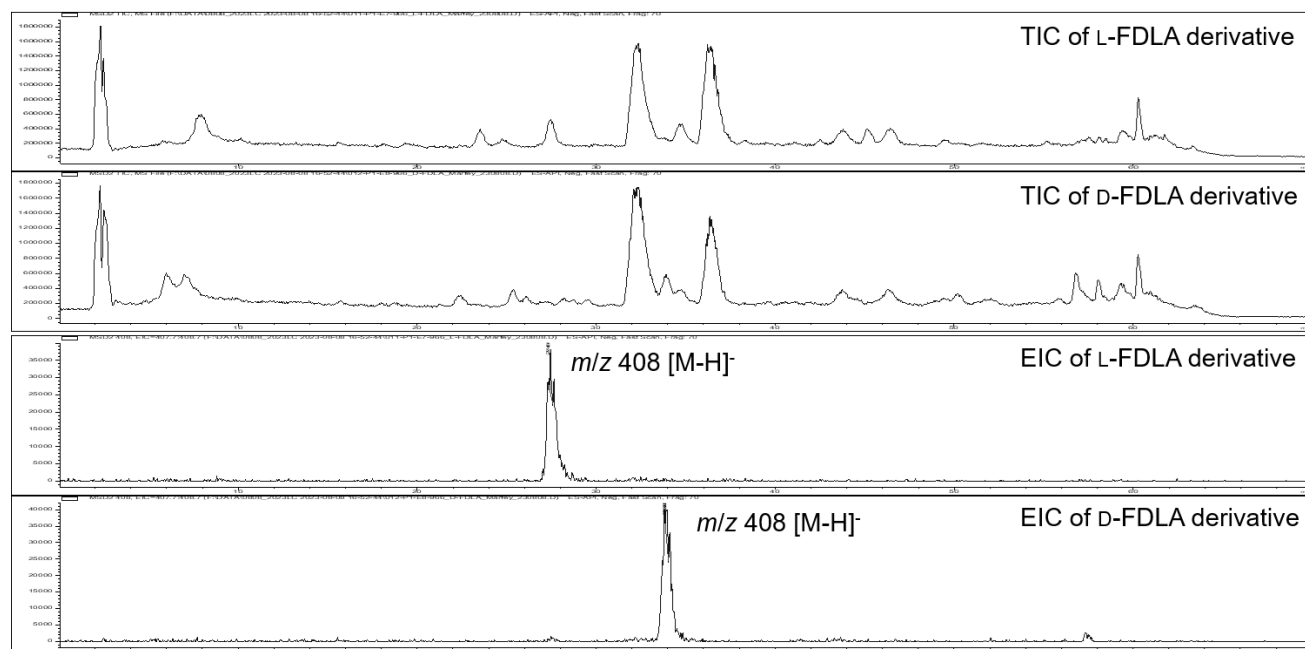

**(D)** Comparison between L-FDLA and D-FDLA derivatives of valine in **1**.

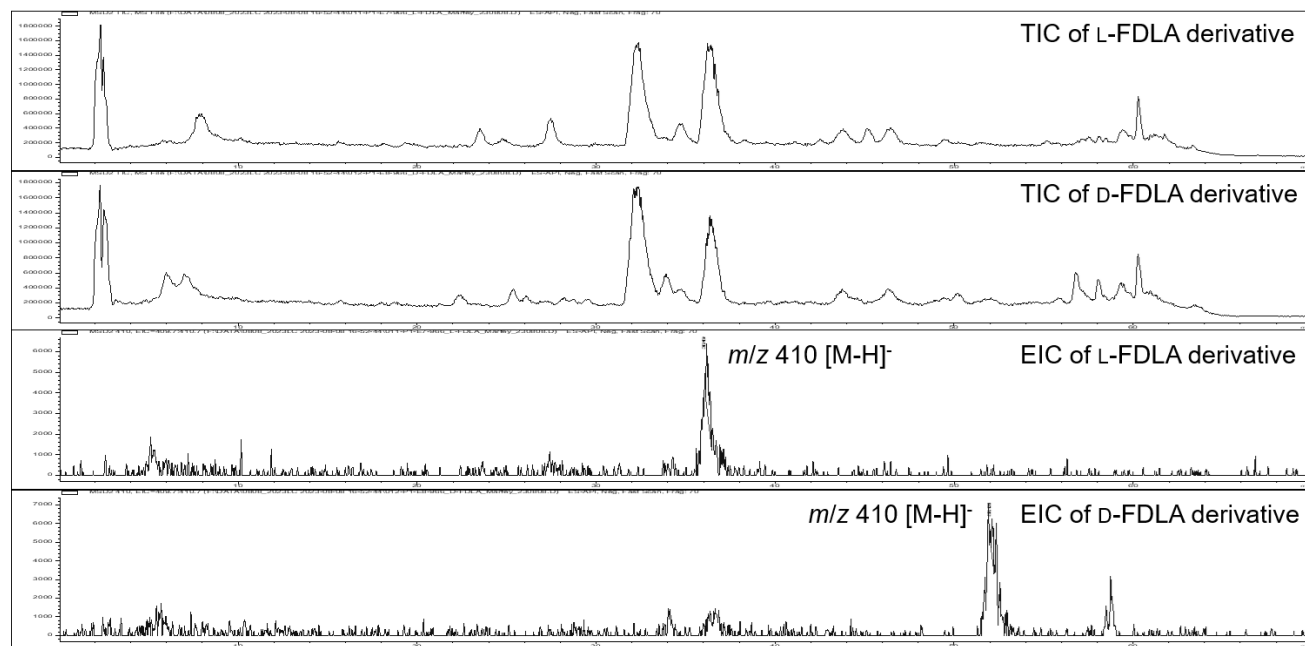

(E) Comparison between L-FDLA and D-FDLA derivatives of phenylalanine in **1**.

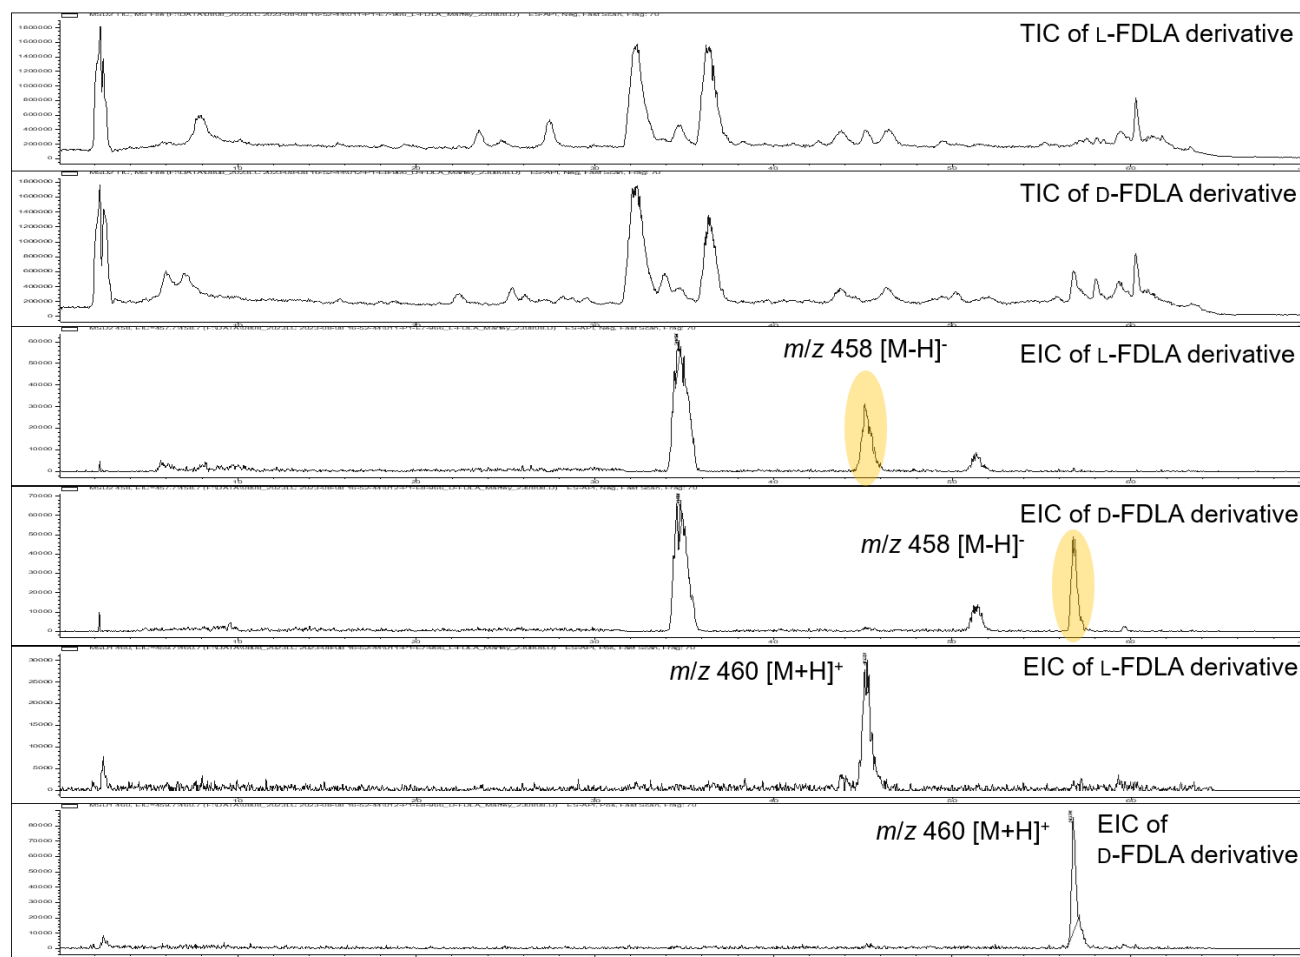

**Figure S13.** GITC analysis of hydrolysate of **1** to confirm configuration of  $\beta$  carbon of threonine in **1**.

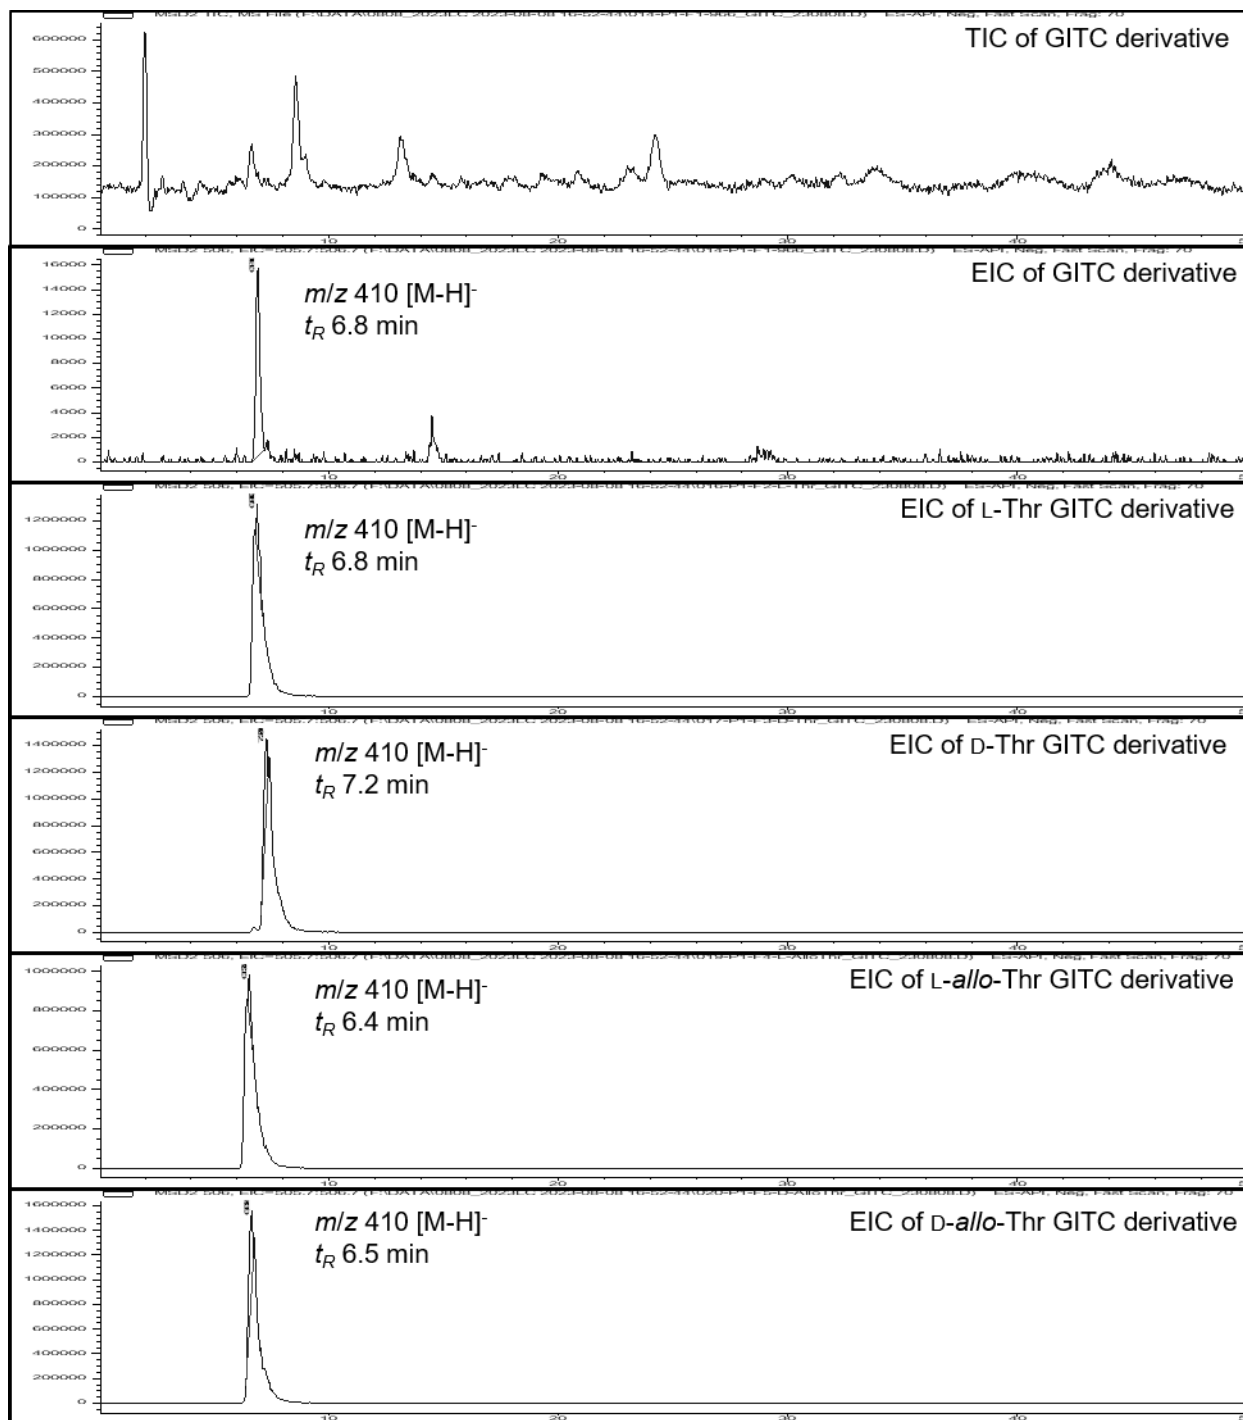

**Figure S14.** HRESIMS/MS analysis of xinghamide A (**1**).

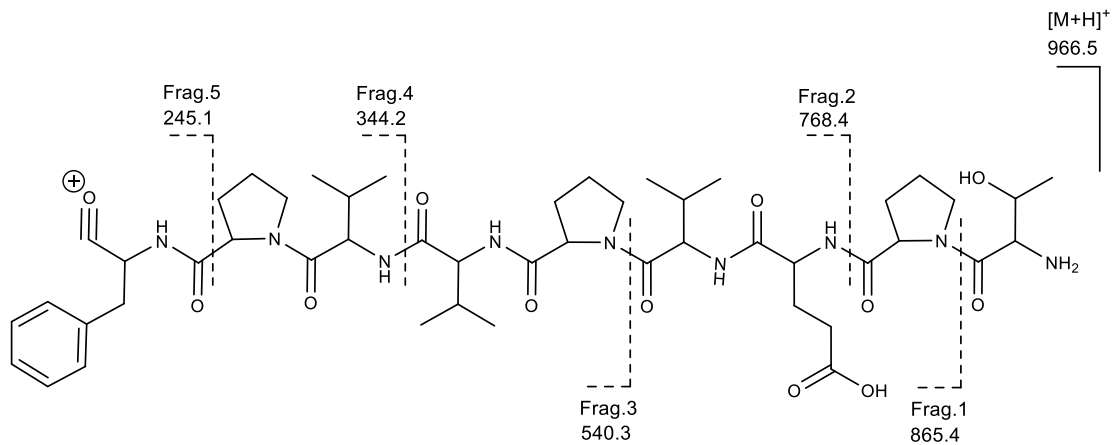

Spectrum from YSL1\_966.wiff (sample 1) - YSL1\_966, Experiment 1, MS<sup>2</sup> (100 - 2000) from 0.322 min

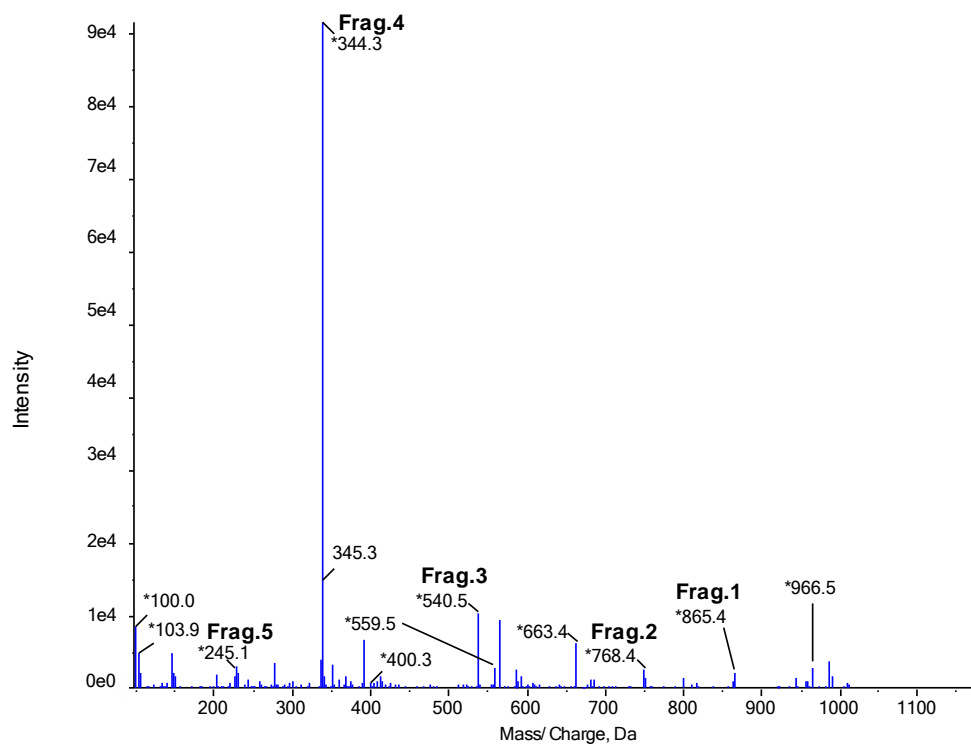

**Table S1.** LC/MS analysis of L, D-FDLA derivatives of the amino acids in xinghamide A (**1**).

| <b>Amino acid</b> | <b><math>t_{RL}</math> (min)</b> | <b><math>t_{RD}</math> (min)</b> | <b>Elution order</b> | <b><math>\Delta t</math> (min)</b> |
|-------------------|----------------------------------|----------------------------------|----------------------|------------------------------------|
| Threonine         | 19.2                             | 28.7                             | L→D                  | 9.5                                |
| Glutamic acid     | 23.5                             | 25.4                             | L→D                  | 1.9                                |
| Proline           | 27.5                             | 33.9                             | L→D                  | 6.4                                |
| Valine            | 36.1                             | 52.1                             | L→D                  | 16                                 |
| Phenylalanine     | 45.2                             | 55.7                             | L→D                  | 10.5                               |
